# Supplementary material for: Effect of albumin coating on the magnetic behavior of Mn ferrite nanoclusters
Source: Royal Society of Chemistry journal article supplement (doi:10.1039/d2na00458e), 2022-01-01
Supplement: d2na00458e1.pdf [file d2na00458e1.pdf]

## Supporting information

### Effect of albumin coating on the magnetic behavior of Mn ferrite nanoclusters

Marianna Vasilakaki,<sup>a</sup> Nikolaos Ntallis,<sup>a</sup> Dino Fiorani,<sup>b</sup> Davide Peddis,<sup>b,c</sup> and Kalliopi N. Trohidou\*<sup>a</sup>

<sup>a</sup>Institute of Nanoscience and Nanotechnology, NCSR “Demokritos”, 153 10 Agia Paraskevi, Attiki, Greece.

<sup>b</sup>Istituto di Struttura della Materia-CNR, 00015 Monterotondo Scalo (RM), Italy

<sup>c</sup>Univ. Genoa, Dept. Chem. & Ind. Chem., Via Dodecaneso 31, I-16146 Genova, Italy

#### Short description of the mesoscopic model and the parameters

The mesoscopic model that simulates an assembly of Mn ferrite nanoparticles of diameter  $D = 2$  nm with a core/surface morphology and the exchange inter-particle and long range dipolar interactions it has been described in ref [1] and for an albumin coated assembly in ref [2]. The energy of the system is given by the following expression [3]:

$$\begin{aligned}
 E = & -\sum_{i=1}^N K_c V_1 (\mathbf{s}_{1i} \cdot \hat{\mathbf{e}}_{1i})^2 - \sum_{i=1}^N K_{surf} \left[ V_2 (\mathbf{s}_{2i} \cdot \hat{\mathbf{e}}_{2i})^2 + V_3 (\mathbf{s}_{3i} \cdot \hat{\mathbf{e}}_{3i})^2 \right] \\
 & - \frac{1}{2} \sum_{i=1}^N \left[ J_{c1} (\mathbf{s}_{1i} \cdot \mathbf{s}_{2i}) + J_{c2} (\mathbf{s}_{1i} \cdot \mathbf{s}_{3i}) + J_{surf} (\mathbf{s}_{2i} \cdot \mathbf{s}_{3i}) \right] \\
 & - \frac{1}{2} g \sum_{i,j=1,i \neq j}^N (m_{1i} \mathbf{s}_{1i} + m_{2i} \mathbf{s}_{2i} + m_{3i} \mathbf{s}_{3i}) D_{ij} (m_{1j} \mathbf{s}_{1j} + m_{2j} \mathbf{s}_{2j} + m_{3j} \mathbf{s}_{3j}) \\
 & - \frac{1}{2} J_{intra-cluster} \sum_{\langle i,j \rangle} \left[ (\mathbf{s}_{2i} \cdot \mathbf{s}_{3j}) + (\mathbf{s}_{3i} \cdot \mathbf{s}_{2j}) \right] - \mu_0 H \sum_{i=1}^N (m_{1i} \mathbf{s}_{1i} + m_{2i} \mathbf{s}_{2i} + m_{3i} \mathbf{s}_{3i}) \cdot \hat{\mathbf{e}}_h \quad (S1)
 \end{aligned}$$

Here each Mn nanoparticle is described with a classical spin ( $\mathbf{s}_{1i}$ ) for the core and two spins ( $\mathbf{s}_{2i}$ ,  $\mathbf{s}_{3i}$ ) for the two surface sublattices. We have calculated the normalized magnetic moments  $m_1 = M_1 V_1 / M_s V$ ,  $m_2 = M_2 V_2 / M_s V$  and  $m_3 = M_3 V_3 / M_s V$ , where  $M_s$  and  $V$  are the saturation magnetization and the volume of each particle and  $V_1, V_2, V_3$  and  $M_1, M_2, M_3$  are the particle volumes and magnetizations of the core spins and the two sublattices of the surface spins respectively. From atomic scale calculations described in ref [1] these parameters are  $m_1=0.1$ ,  $m_2=0.5$ ,  $m_3=0.4$ . Since DFT calculations indicate that the surface magnetic moments

are reduced due to the existence of albumin, we consider  $m_2=0.45$  and  $m_3=0.4$  for the coated nanoparticles.  $D_{ij}$  is the dipolar tensor and  $g = \mu_0(M_s V)^2 / (4\pi d^3 20K_C V_1)$  is the reduced dipolar strength we set  $g = 3.0$ .

The effective anisotropies for the core is taken  $k_c=0.05$  and for the uncoated surface  $k_{srf}=1.0$  for each spin calculated in detail in reference [1]. Since for the albumin coated sample, our DFT calculations indicate that the surface anisotropy is reduced due to the existence of the albumin [2], we set  $k_{srf}=0.8$ .

The effective intra-particle exchange coupling constants are defined as  $j_{c1}(\mathbf{s}_{1i}/\mathbf{s}_{2i})$ ,  $j_{c2}(\mathbf{s}_{1i}/\mathbf{s}_{3i})$  and  $j_{srf}(\mathbf{s}_{2i}/\mathbf{s}_{3i})$ . In the uncoated particles  $j_{c1}=0.5$ ,  $j_{c2}=0.45$ ,  $j_{srf}=-1.0$  and in the coated ones  $j_{c1}=0.5$ ,  $j_{c2}=0.45$ ,  $j_{srf}=-0.8$  [2]. The  $j_{srf}$  is considered to be reduced owing to the metal-albumin bonding that causes the expansion of the neighboring magnetic atoms at the surface of the Mn ferrite nanoparticles, as indicated by our DFT calculations [2]. We consider that the albumin molecules cover a number of nanoparticles and create clusters, thus increasing the fraction of the shell that is in physical contact with the neighboring shells. Therefore, we take the inter-particle exchange coupling constant between the nanoparticles in each isolated cluster as  $j_{intra-cluster}=-0.80$ , increased 60% from the inter-particle exchange coupling strength in the uncoated nanoparticle assembly ( $j_{inter}=-0.50$ ) [1].

## REFERENCES

- [1] M. Vasilakaki, G. Margaris, D. Peddis, R. Mathieu, N. Yaacoub, D. Fiorani, K. Trohidou, Monte Carlo study of the superspin glass behavior of interacting ultrasmall ferrimagnetic nanoparticles, *Phys. Rev. B.* 97 (2018) 094413.
- [2] M. Vasilakaki, N. Ntallis, M. Bellusci, F. Varsano, R. Mathieu, D. Fiorani, D. Peddis, K.N. Trohidou, Effect of Bovine Serum Albumin mediating clustering on the magnetic behaviour of MnFe<sub>2</sub>O<sub>4</sub> Nanoparticles, *Nanotechnology.* 31 (2020) 025707.
- [3] G. Margaris, K.N. Trohidou, J. Nogués, Mesoscopic model for the simulation of large arrays of Bi-magnetic core/shell nanoparticles, *Adv. Mater.* 24 (2012) 4331–4336.
